# Supplementary material for: The expression of virulence genes increases membrane permeability and sensitivity to envelope stress in Salmonella Typhimurium
Source: PubMed Central journal article supplement (PMC9017878; doi:10.1371/journal.pbio.3001608), 2022-04-07

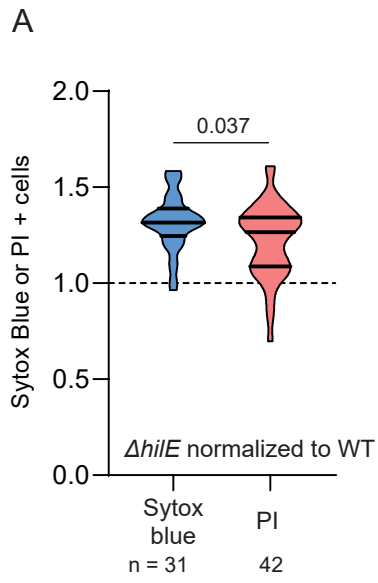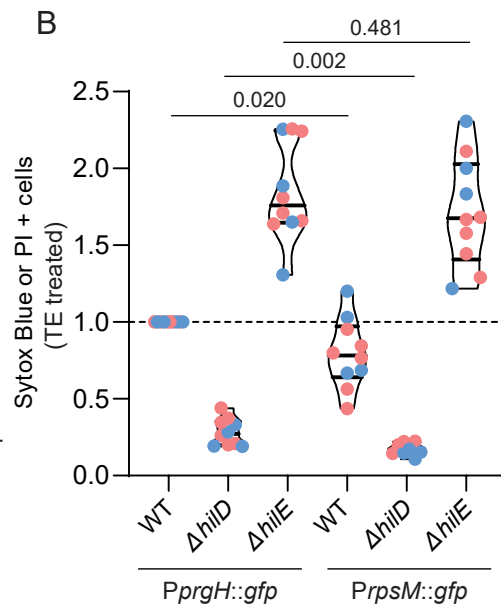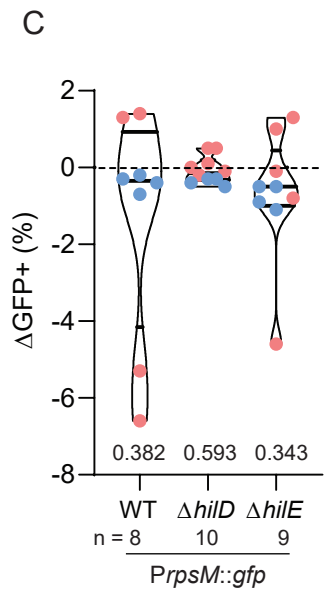

**D**

Phase contrast  
+ PI

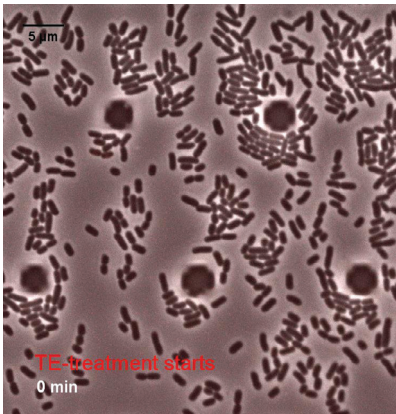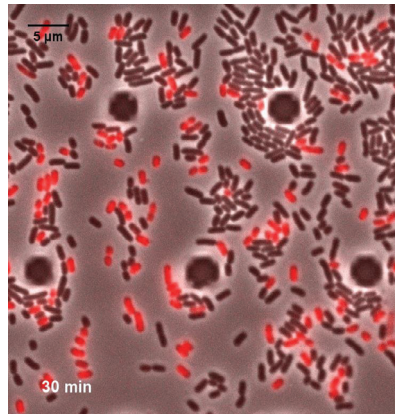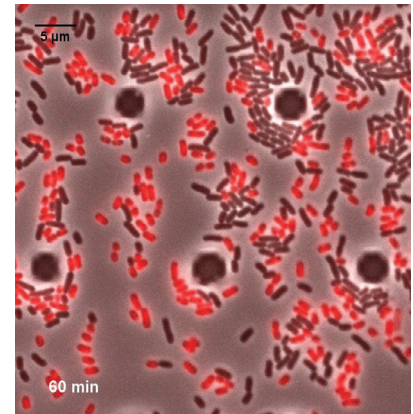

Phase contrast  
+ Sytox Blue

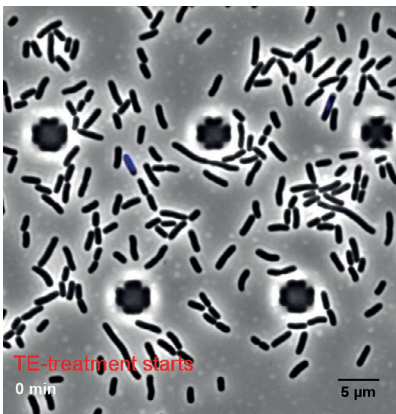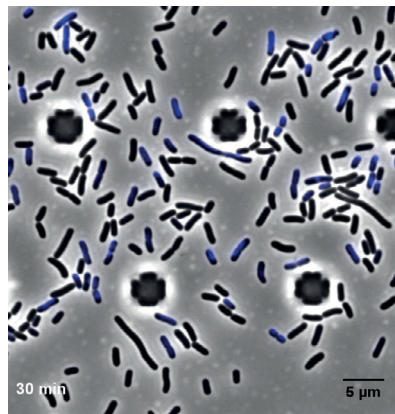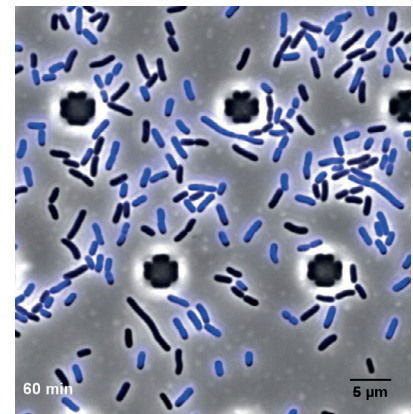

Supplement: pbio.3001608.s006.pdf [file pbio.3001608.s006.pdf]
